# Supplementary material for: Solution-processable and functionalizable ultra-high molecular weight polymers via topochemical synthesis
Source: PubMed Central journal article supplement (PMC8613210; doi:10.1038/s41467-021-27090-1), 2021-11-24
Supplement: 41467_2021_27090_MOESM2_ESM.pdf [file 41467_2021_27090_MOESM2_ESM.pdf]

## **Description of Additional Supplementary Files**

File Name: Supplementary Movie 1

Description: Optical changes of the monomer **1** crystal upon topochemical polymerization
